# Supplementary material
Source: HighWire-hosted journal article supplement (http://jpet.aspetjournals.org/highwire/filestream/144834/field_highwire_adjunct_files/0/259077SupplFigures.pdf)
Supplement: 259077SupplFigures.pdf [file 259077SupplFigures.pdf]

Injectable pasty biodegradable polymers derived from castor oil and hydroxy-acid  
lactones

Noam Y. Steinman<sup>†</sup> and Abraham J. Domb<sup>†\*</sup>

<sup>†</sup>Institute of Drug Research, School of Pharmacy-Faculty of Medicine, The Hebrew  
University of Jerusalem, Jerusalem, 91120, Israel

## Supplementary Information

### 1. $^1\text{H}$ NMR spectra

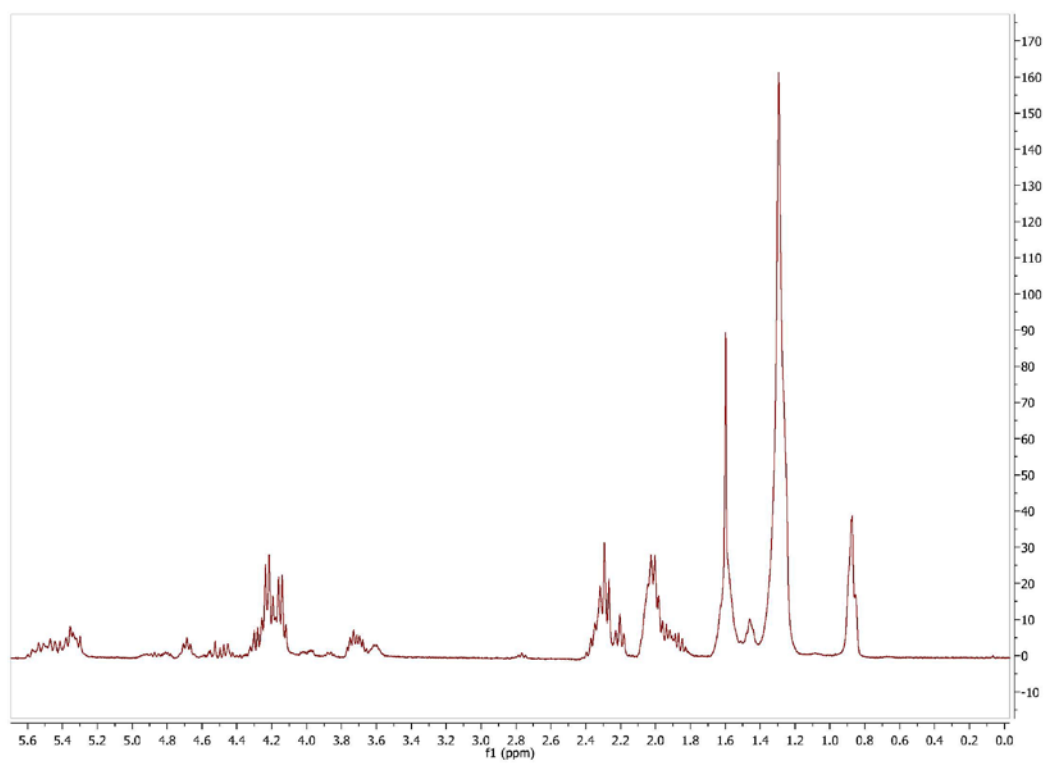

**Figure S1.**  $^1\text{H}$  NMR spectrum of CO:PCL 1

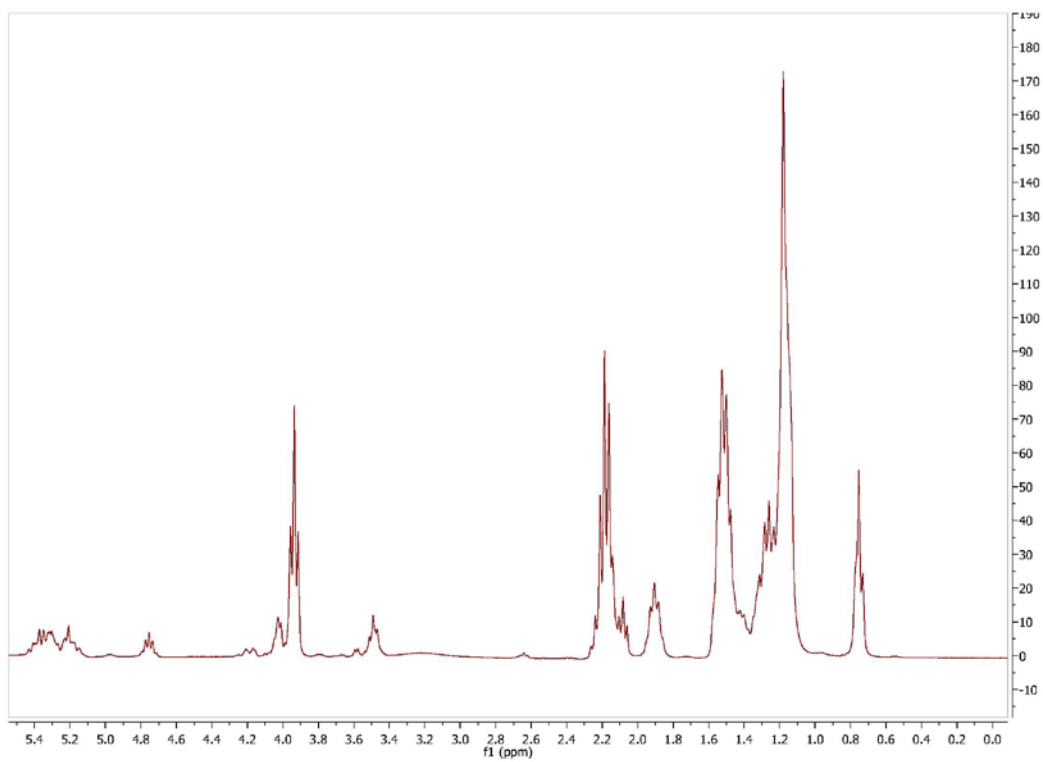

**Figure S2.** <sup>1</sup>H NMR spectrum of CO:PCL 2

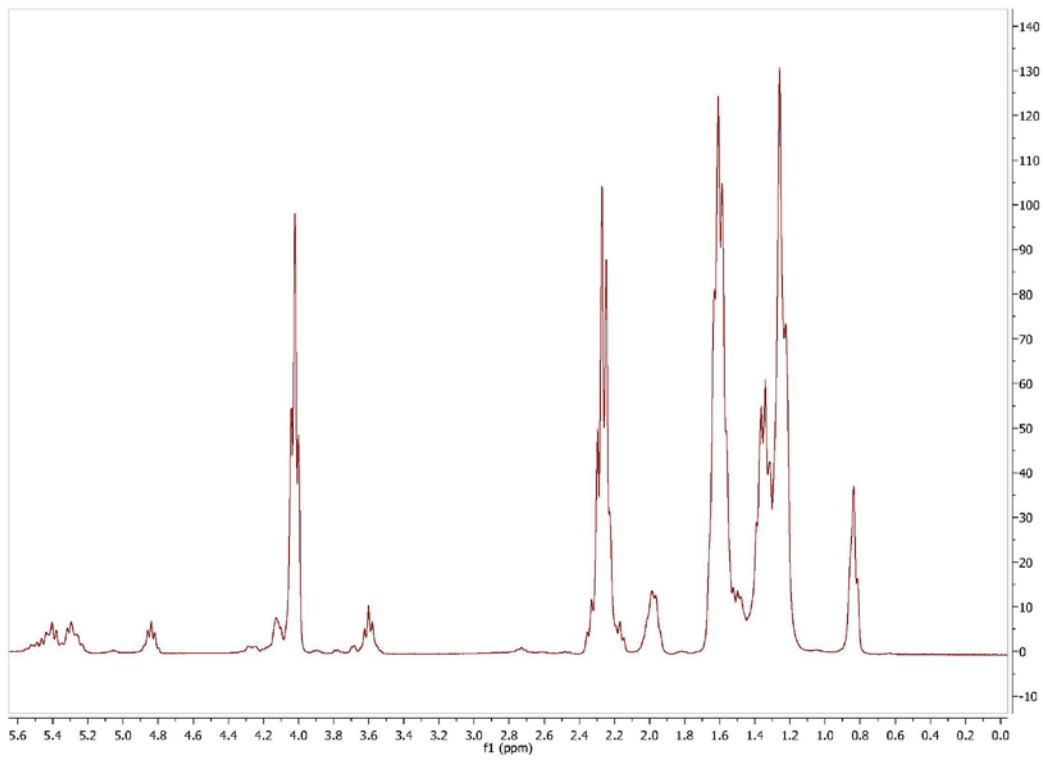

**Figure S3.**  $^1\text{H}$  NMR spectrum of CO:PCL 3

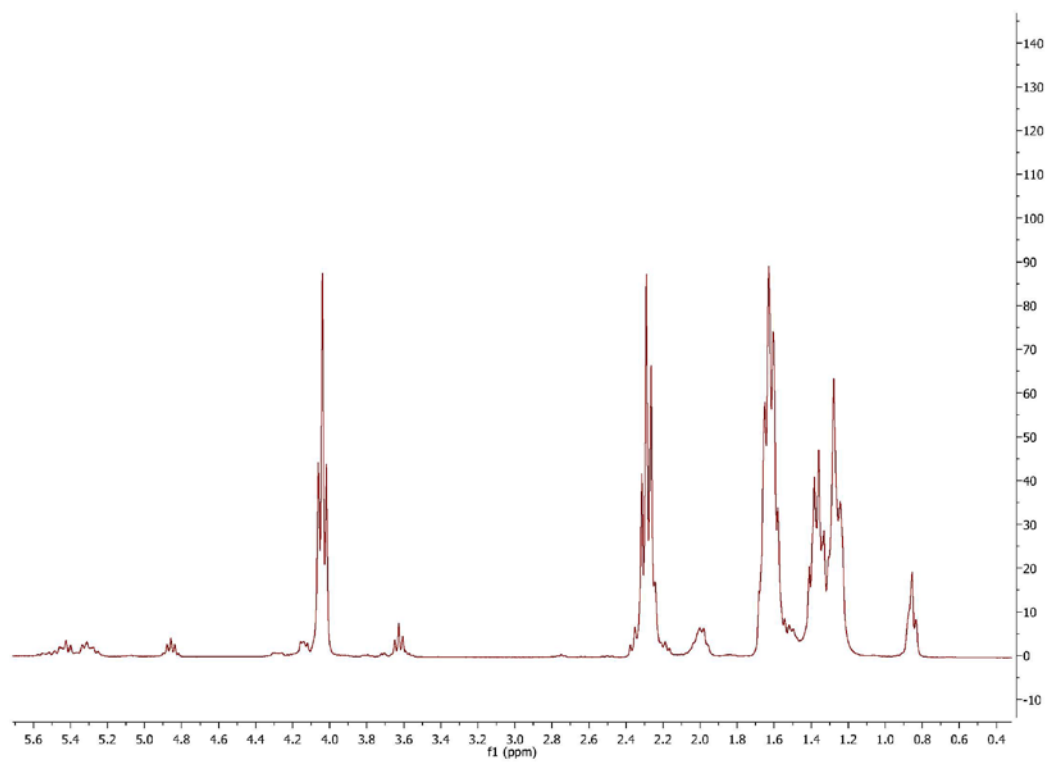

**Figure S4.**  $^1\text{H}$  NMR spectrum of CO:PCL 4

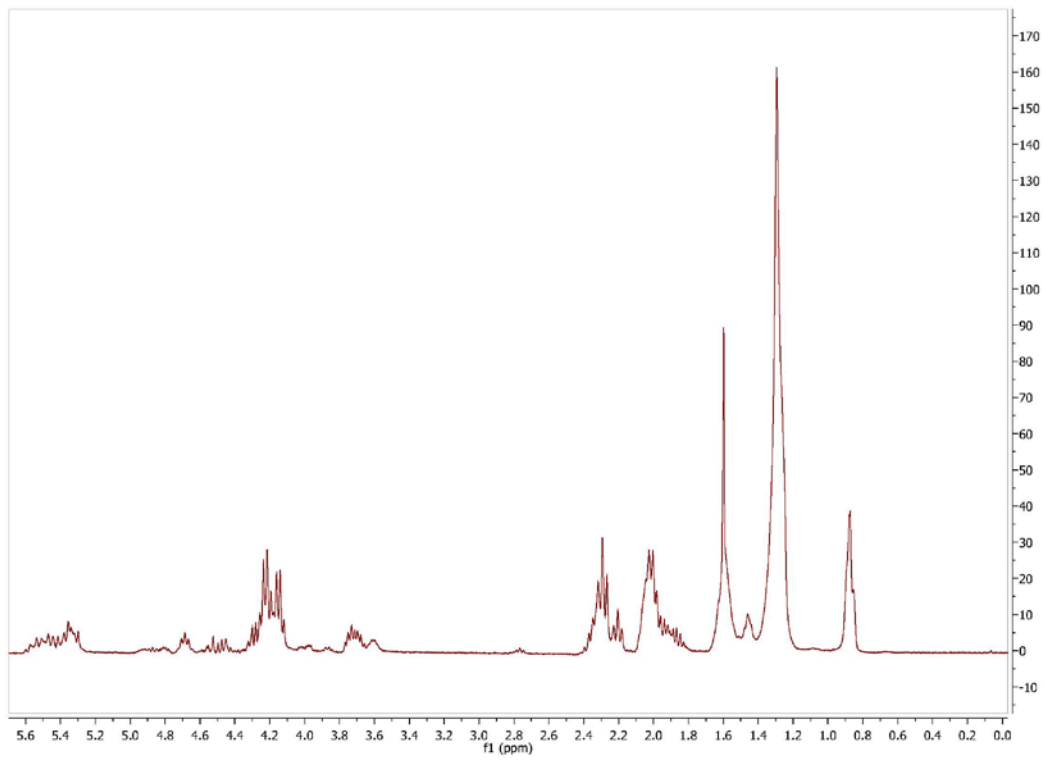

**Figure S5.**  $^1\text{H}$  NMR spectrum of CO:PTMC 5

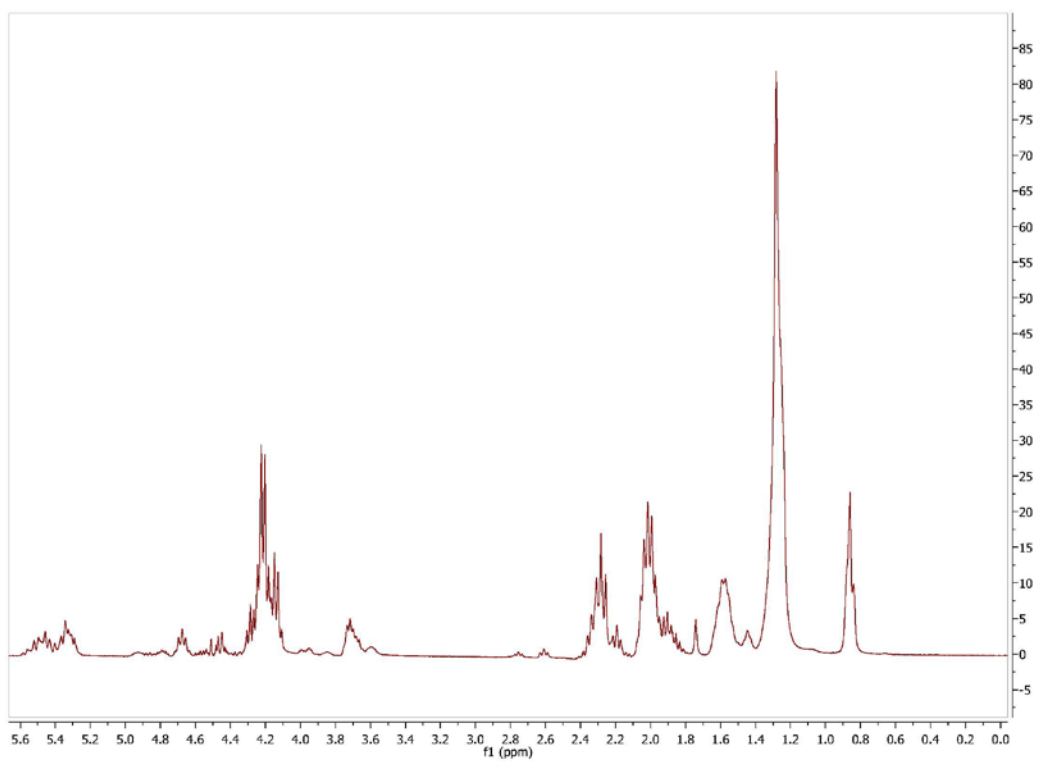

**Figure S6.**  $^1\text{H}$  NMR spectrum of CO:PTMC 6

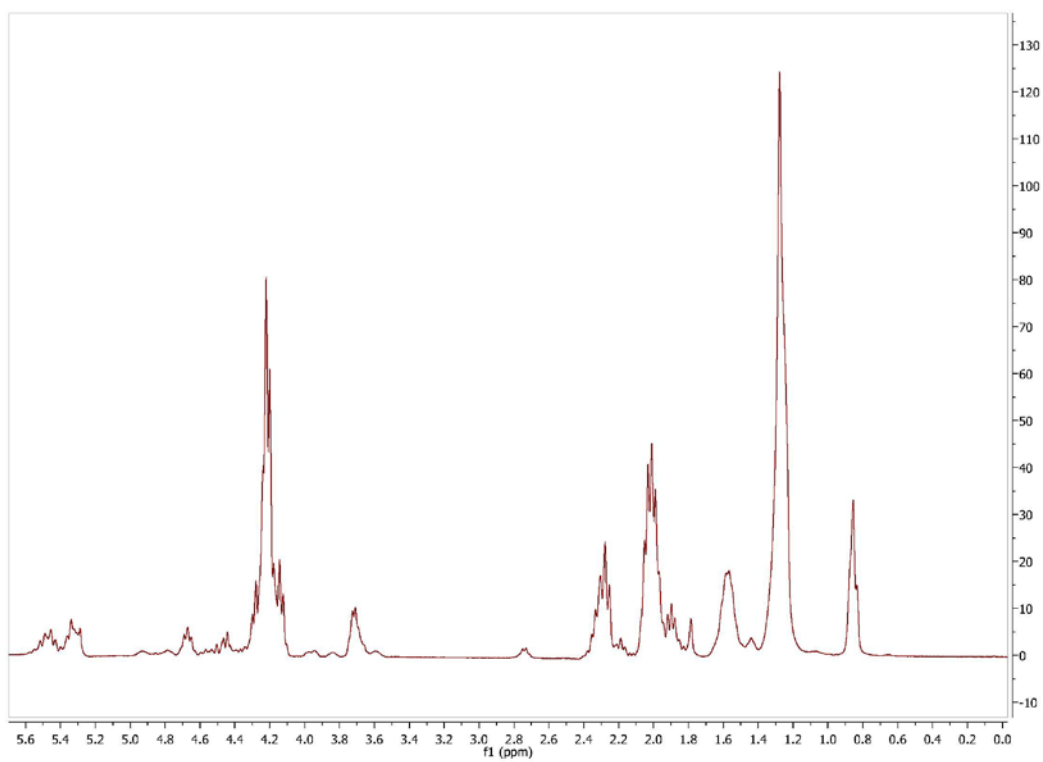

**Figure S7.** <sup>1</sup>H NMR spectrum of CO:PTMC 7



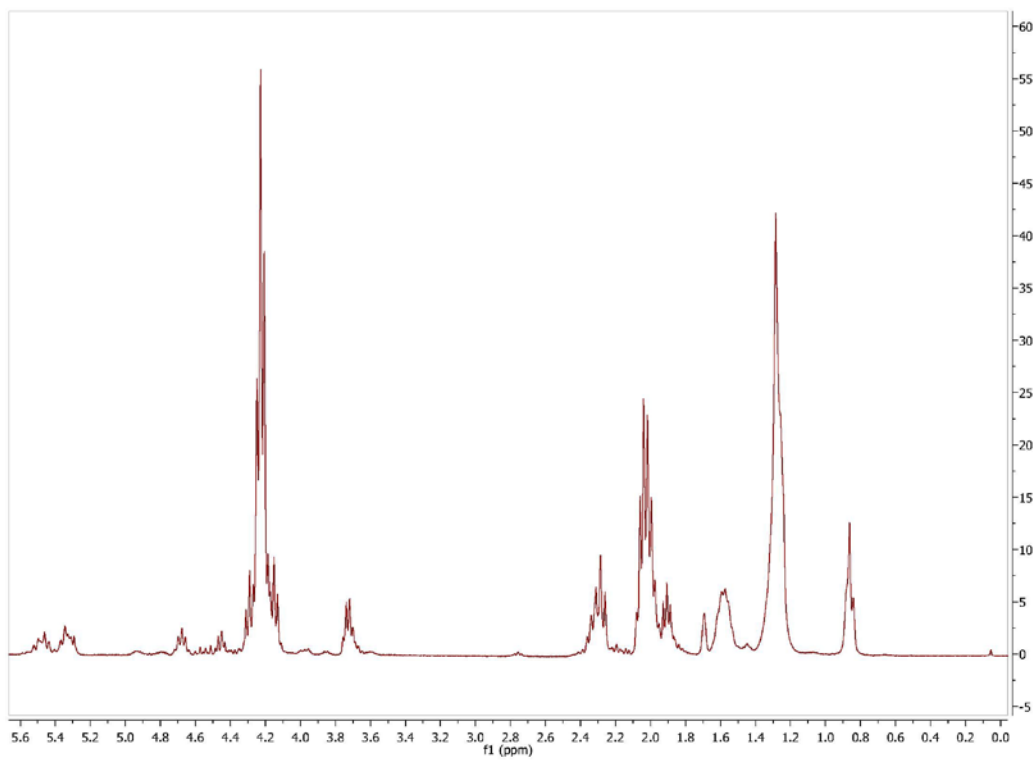

**Figure S8.**  $^1\text{H}$  NMR spectrum of CO:PTMC 8

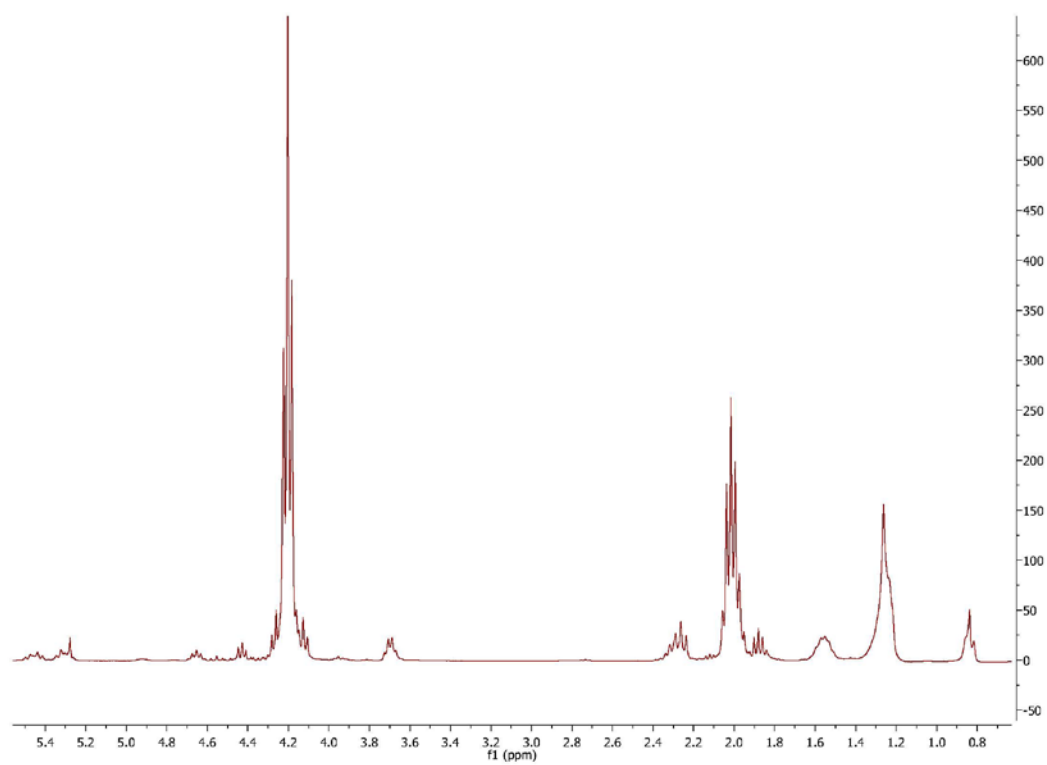

**Figure S9.**  $^1\text{H}$  NMR spectrum of CO:PTMC 9

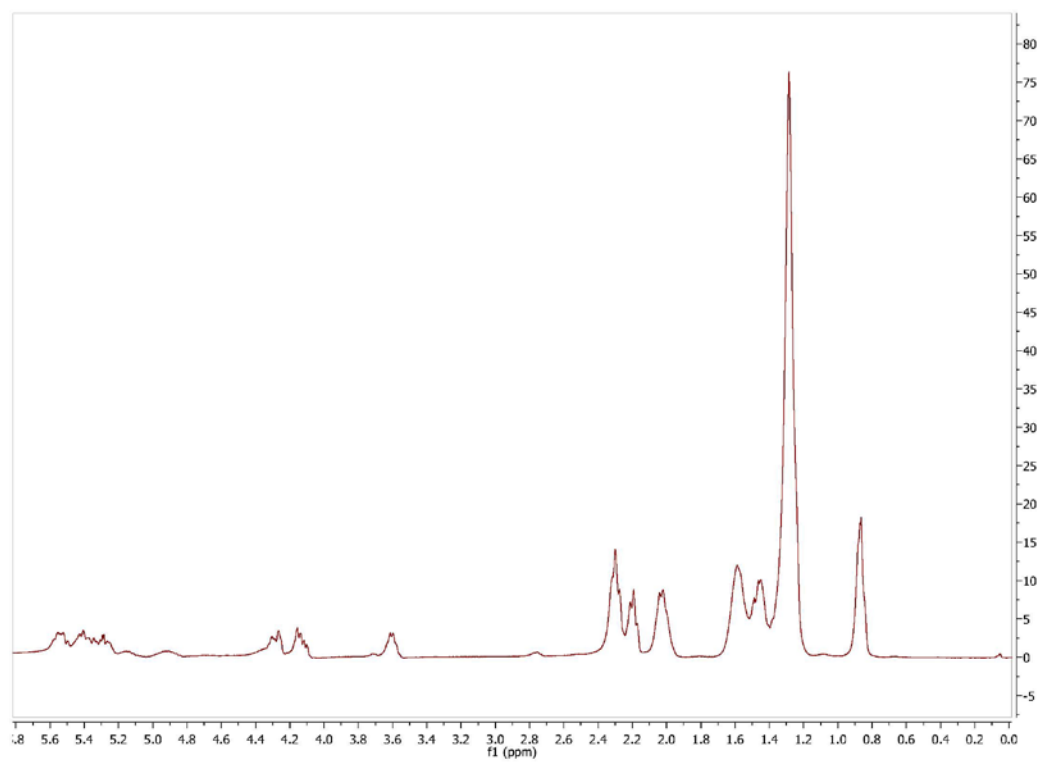

**Figure S10.**  $^1\text{H}$  NMR spectrum of CO:PLGA 10

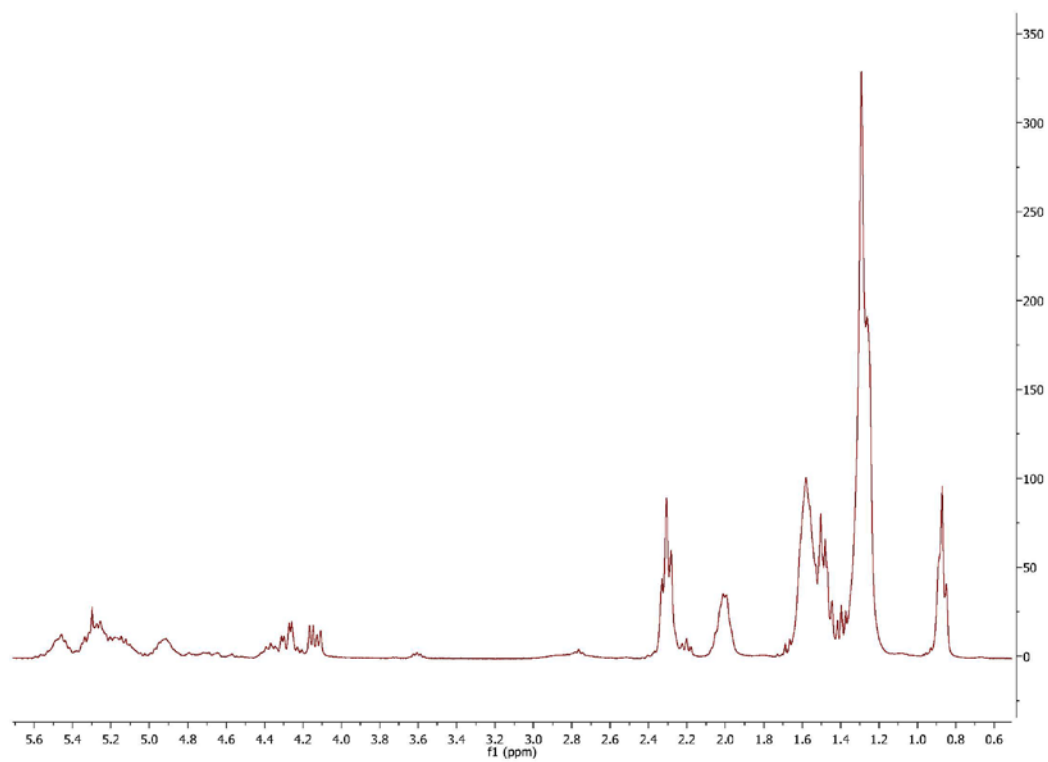

**Figure S11.** <sup>1</sup>H NMR spectrum of CO:PLGA 11

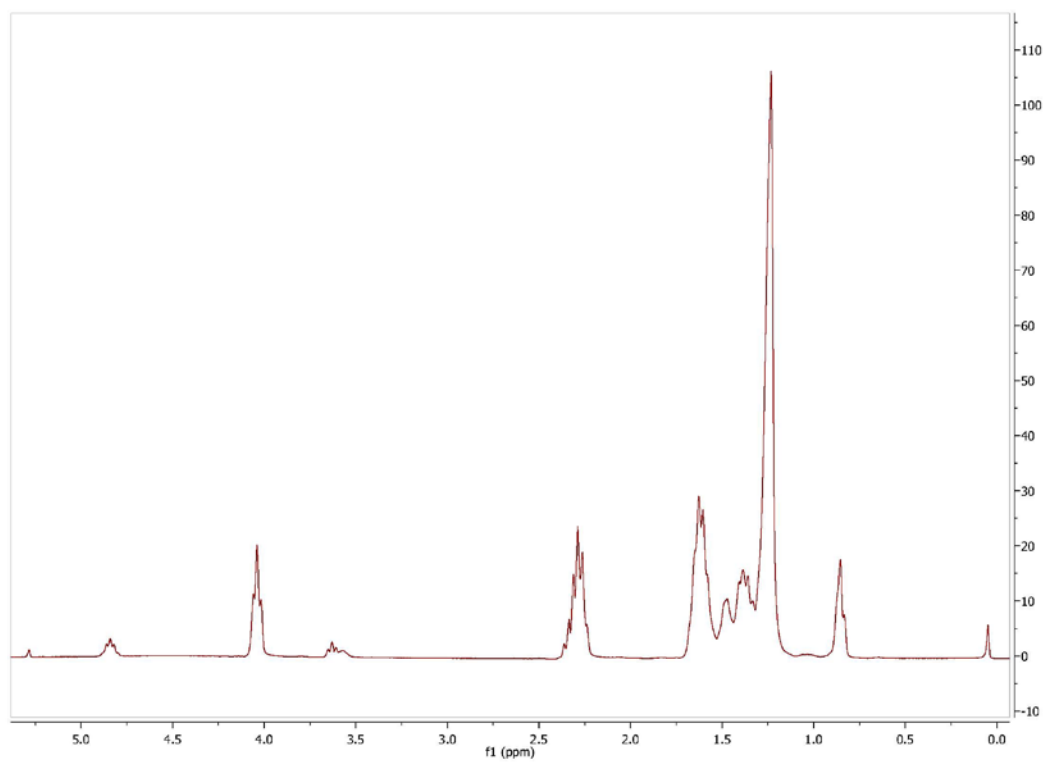

**Figure S12.**  $^1\text{H}$  NMR spectrum of HS:PCL 12

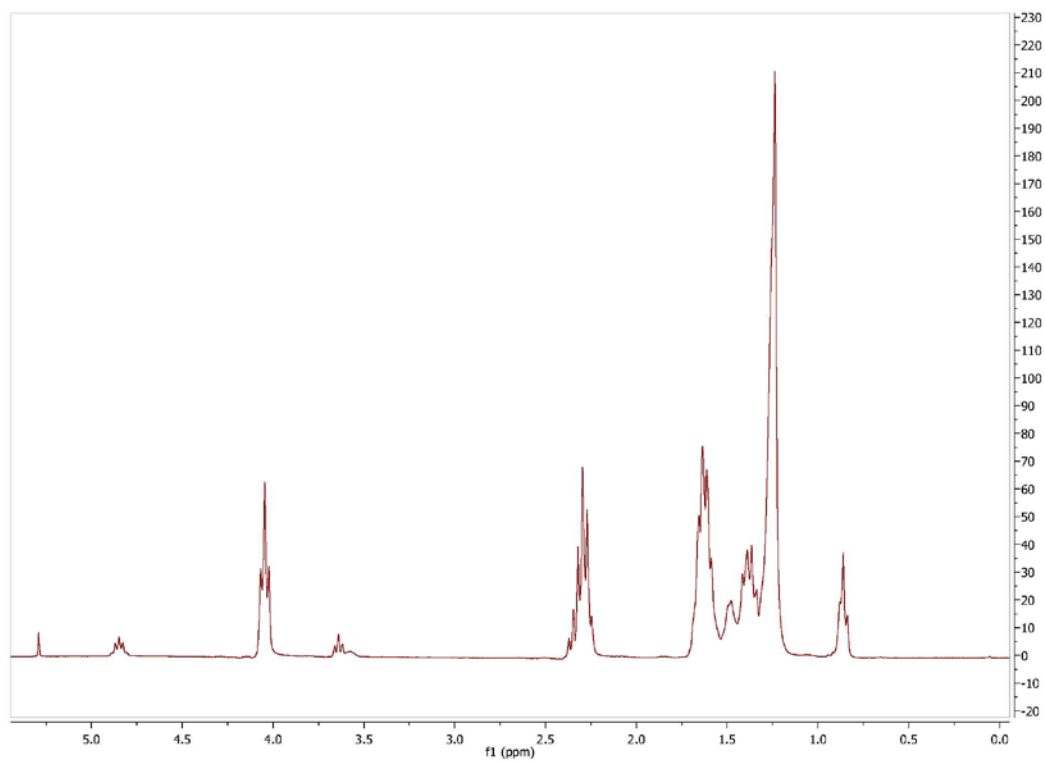

**Figure S13.**  $^1\text{H}$  NMR spectrum of HS:PCL 13

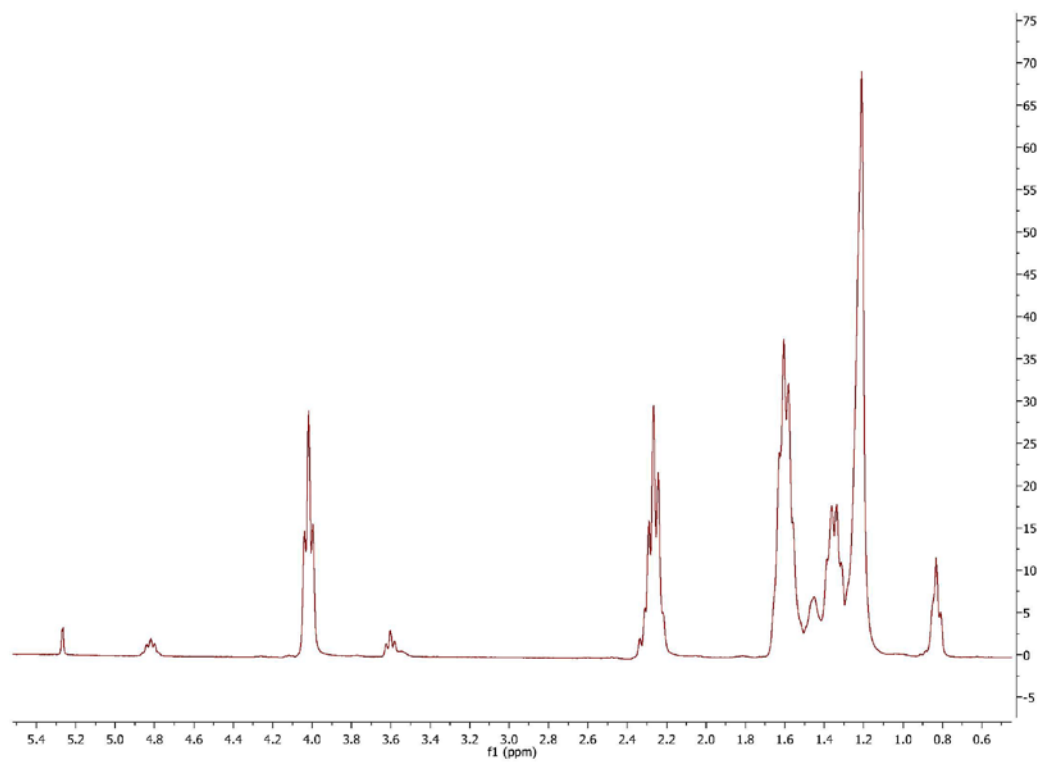

**Figure S14.**  $^1\text{H}$  NMR spectrum of HS:PCL 14

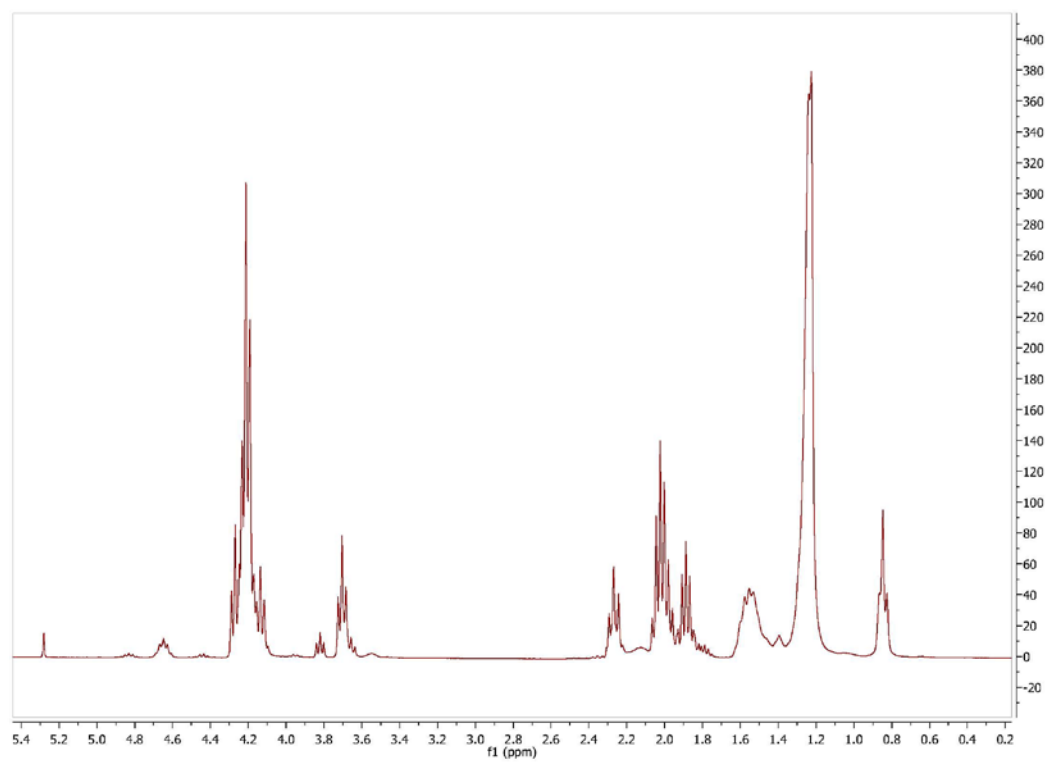

**Figure S15.**  $^1\text{H}$  NMR spectrum of HS:PTMC 15



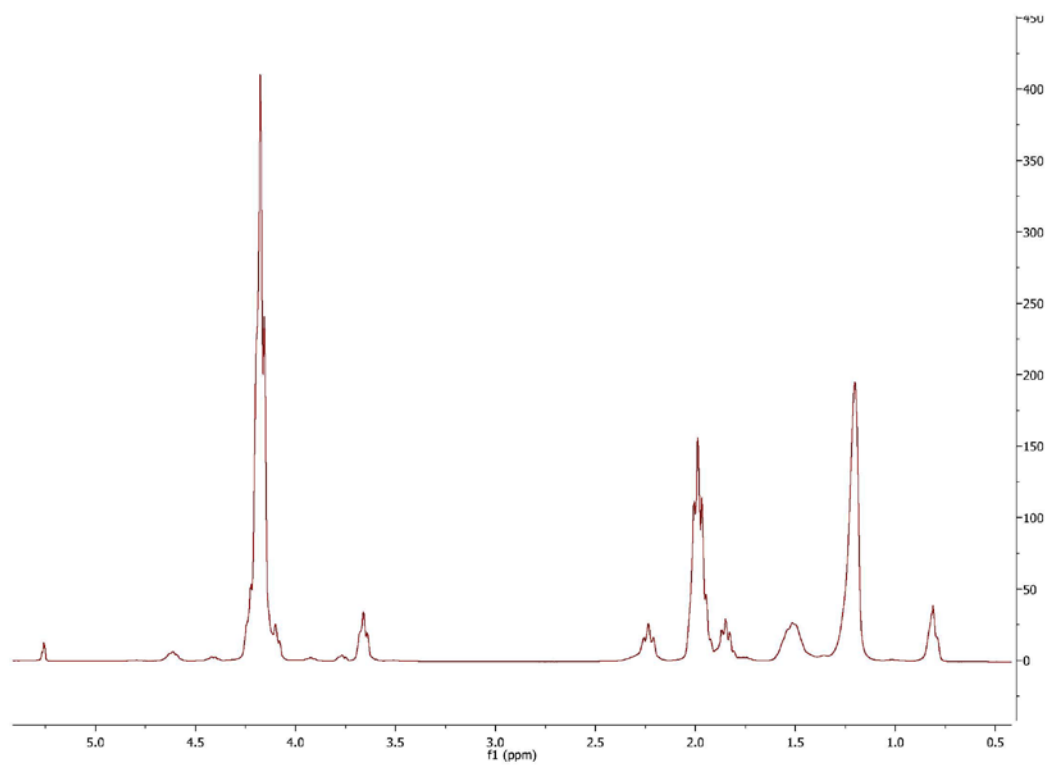

**Figure S16.**  $^1\text{H}$  NMR spectrum of HS:PTMC 16

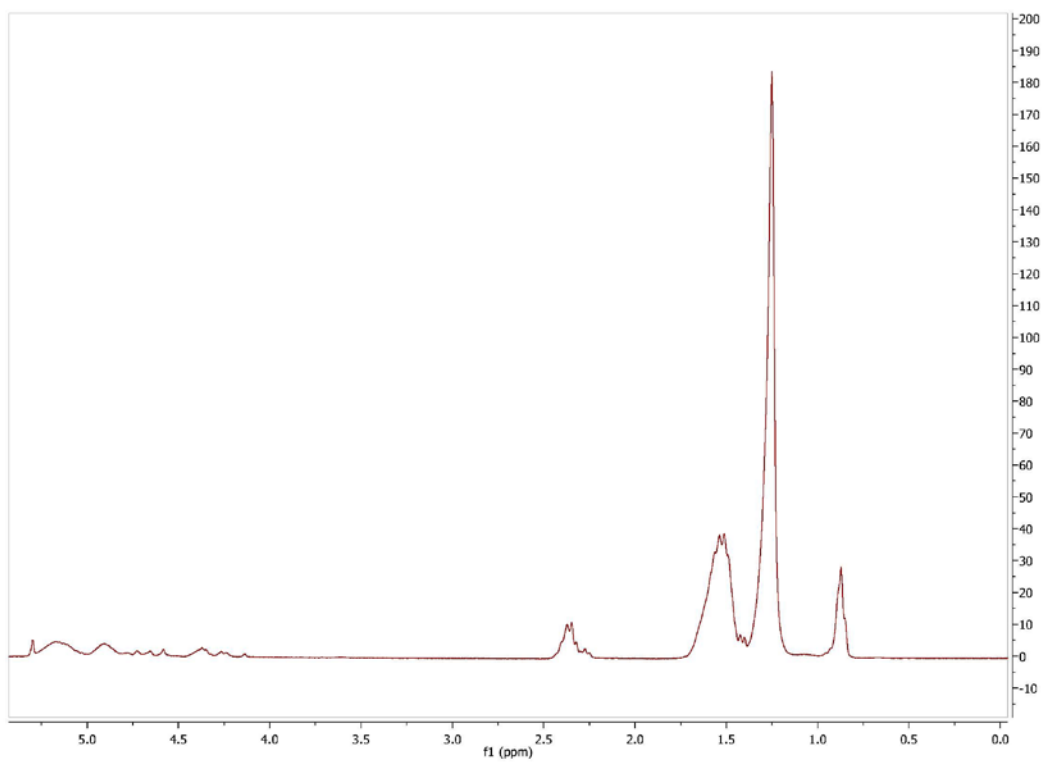

**Figure S17.**  $^1\text{H}$  NMR spectrum of HS:PLGA 17

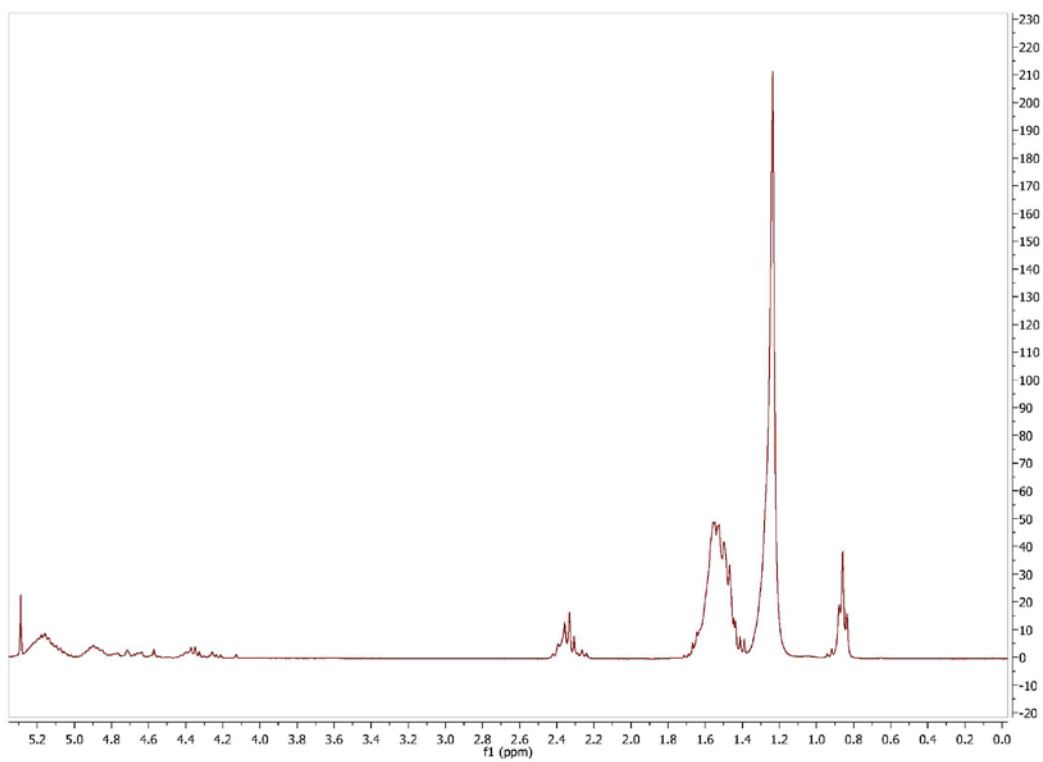

**Figure S18.**  $^1\text{H}$  NMR spectrum of HS:PLGA 18

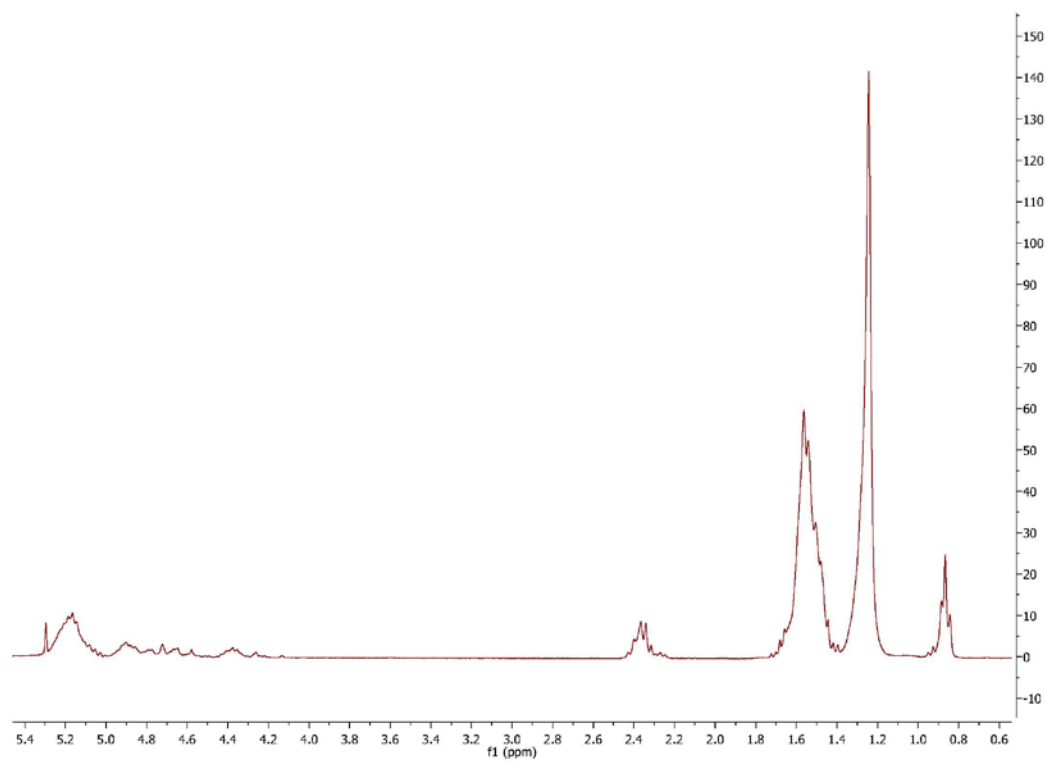

**Figure S19.**  $^1\text{H}$  NMR spectrum of HS:PLGA 19
